# Supplementary material
Source: publisher site journal article supplement (https://www.dovepress.com/article/433331)
Supplement: Supplementary file 1 [file get_supplementary_file.php]

**Supplementary material**

**Supplementary material S1a.** Questionnaire translated into English: GP version.

| **Personal information** | | | | | | | | |
| --- | --- | --- | --- | --- | --- | --- | --- | --- |
| 1. Age ____years | | | | | | | | |
| 2. Gender | □ Female | | □ Male | | | | □ Diverse | |
| 3. What is your highest educational level? | □ University entrance qualification | | □ Upper secondary education (grade 10) | | | | □ Lower secondary education (grade 8 - 9) | |
| □ Vocational qualification | | | | □ No degree | | | |
| 4. What is your highest professional qualification? | □ No professional qualification | | | | □ Semi-skilled training | | | |
| □ Apprenticeship | | | | □ Vocational school | | | |
| □ Specialized technical training | | | | □ University degree | | | |
| 5. Employment | □ Employed | | □ Unemployed | | | | □ Retired | |
| 6. Do you get an influenza vaccination annually? | | □ Yes, always | | □ Yes, mostly | | □ Yes, rarely | | □ No, never |

| **Vaccination motivation** | | | | | | | | |
| --- | --- | --- | --- | --- | --- | --- | --- | --- |
| 7. Please indicate your main reason why you wanted to get vaccinated. *(Please tick up to three motivations.)* | □ Infection protection | | | □ Recommendation by friends/family | | | | |
| □ Recommendation by GP | | | □ Benefits through vaccination | | | | |
| □ Societal expectations | | | □ Protection of others | | | | |
| □ Other reasons: | | | | | | | |
| 8. Would you be willing to pay money for the vaccination? | | | □ Yes | | | □ No | | □ Not sure |
| 9. If yes, how much? | □ up to 10 € | □ 11-20 € | | | | | □ 21-50 € | |
| □ 51-100 € | | | | □ > 100 € | | | |

| **Attitudes and opinions** | | | | | |
| --- | --- | --- | --- | --- | --- |
| **10. Please tick to what extent you agree with the statement.**  **1= Strongly disagree 5= Strongly agree** | | | | | |
|  | **1** | **2** | **3** | **4** | **5** |
| It was **important** for me to be vaccinated by my GP. | □ | □ | □ | □ | □ |
| I would also get vaccinated against COVID-19 at the **vaccination center**. | □ | □ | □ | □ | □ |
| I had **concerns** about the health risks of COVID-19 vaccines. | □ | □ | □ | □ | □ |
| I am generally **skeptical** about COVID-19 vaccines. | □ | □ | □ | □ | □ |

| **11. Please tick which statement applies to you.** | | | | | | | | | | |
| --- | --- | --- | --- | --- | --- | --- | --- | --- | --- | --- |
|  | 1 | 2 | 3 | 4 | 5 | 6 | 7 | 8 | 9 | 10 |
| How important is vaccination against COVID-19 for you?  **1=Not at all important │ 10=Very important** | □ | □ | □ | □ | □ | □ | □ | □ | □ | □ |
| How important was it for you to be vaccinated against COVID-19 as soon as possible?  **1=Not at all important │ 10=Very important** | □ | □ | □ | □ | □ | □ | □ | □ | □ | □ |
| The risk of getting seriously ill from COVID-19 worries me.  **1=Not at all │ 10=Very strongly** | □ | □ | □ | □ | □ | □ | □ | □ | □ | □ |
| How high did you perceive the risk of getting infected with COVID-19 **before** vaccination?  **1=Very low │ 10=Very high** | □ | □ | □ | □ | □ | □ | □ | □ | □ | □ |
| How high did you perceive the risk of getting infected with COVID-19 **after** vaccination?  **1=Very low │ 10=Very high** | □ | □ | □ | □ | □ | □ | □ | □ | □ | □ |
| How do you rate your own influence (e.g., wearing a mask, avoiding crowds) to avoid infection with COVID-19?  **1=Very low │ 10=Very high** | □ | □ | □ | □ | □ | □ | □ | □ | □ | □ |
| In your opinion, how important is a vaccine to combat the COVID-19 pandemic?  **1=Not at all important │ 10=Very important** | □ | □ | □ | □ | □ | □ | □ | □ | □ | □ |

**Supplementary material S1b.** Questionnaire translated into English: Vaccination center version.

| **Personal information** | | | | | | | | |
| --- | --- | --- | --- | --- | --- | --- | --- | --- |
| 1. Age ____years | | | | | | | | |
| 2. Gender | □ Female | | □ Male | | | | □ Diverse | |
| 3. What is your highest educational level? | □ University entrance qualification | | □ Upper secondary education (grade 10) | | | | □ Lower secondary education (grade 8 - 9) | |
| □ Vocational qualification | | | | □ No degree | | | |
| 4. What is your highest professional qualification? | □ No professional qualification | | | | □ Semi-skilled training | | | |
| □ Apprenticeship | | | | □ Vocational school | | | |
| □ Specialized technical training | | | | □ University degree | | | |
| 5. Employment | □ Employed | | □ Unemployed | | | | □ Retired | |
| 6. Do you get an influenza vaccination annually? | | □ Yes, always | | □ Yes, mostly | | □ Yes, rarely | | □ No, never |

| **Vaccination motivation** | | | | | | | | |
| --- | --- | --- | --- | --- | --- | --- | --- | --- |
| 7. Please indicate your main reason why you wanted to get vaccinated. *(Please tick up to three motivations.)* | □ Infection protection | | | □ Recommendation by friends/family | | | | |
| □ Recommendation by GP | | | □ Benefits through vaccination | | | | |
| □ Societal expectations | | | □ Protection of others | | | | |
| □ Other reasons: | | | | | | | |
| 8. Would you be willing to pay money for the vaccination? | | | □ Yes | | | □ No | | □ Not sure |
| 9. If yes, how much? | □ up to 10 € | □ 11-20 € | | | | | □ 21-50 € | |
| □ 51-100 € | | | | □ > 100 € | | | |

| **Attitudes and opinions** | | | | | |
| --- | --- | --- | --- | --- | --- |
| **10. Please tick to what extent you agree with the statement.**  **1= Strongly disagree 5= Strongly agree** | | | | | |
|  | **1** | **2** | **3** | **4** | **5** |
| I would have **preferred** to be vaccinated by my GP. | □ | □ | □ | □ | □ |
| I would go to the vaccination center **again** to be vaccinated against COVID-19. | □ | □ | □ | □ | □ |
| I had **concerns** about the health risks of COVID-19 vaccines. | □ | □ | □ | □ | □ |
| I am generally **skeptical** about COVID-19 vaccines. | □ | □ | □ | □ | □ |

| **11. Please tick which statement applies to you.** | | | | | | | | | | |
| --- | --- | --- | --- | --- | --- | --- | --- | --- | --- | --- |
|  | 1 | 2 | 3 | 4 | 5 | 6 | 7 | 8 | 9 | 10 |
| How important is vaccination against COVID-19 for you?  **1=Not at all important │ 10=Very important** | □ | □ | □ | □ | □ | □ | □ | □ | □ | □ |
| How important was it for you to be vaccinated against COVID-19 as soon as possible?  **1=Not at all important │ 10=Very important** | □ | □ | □ | □ | □ | □ | □ | □ | □ | □ |
| The risk of getting seriously ill from COVID-19 worries me.  **1=Not at all │ 10=Very strongly** | □ | □ | □ | □ | □ | □ | □ | □ | □ | □ |
| How high did you perceive the risk of getting infected with COVID-19 **before** vaccination?  **1=Very low │ 10=Very high** | □ | □ | □ | □ | □ | □ | □ | □ | □ | □ |
| How high did you perceive the risk of getting infected with COVID-19 **after** vaccination?  **1=Very low │ 10=Very high** | □ | □ | □ | □ | □ | □ | □ | □ | □ | □ |
| How do you rate your own influence (e.g., wearing a mask, avoiding crowds) to avoid infection with COVID-19?  **1=Very low │ 10=Very high** | □ | □ | □ | □ | □ | □ | □ | □ | □ | □ |
| In your opinion, how important is a vaccine to combat the COVID-19 pandemic?  **1=Not at all important │ 10=Very important** | □ | □ | □ | □ | □ | □ | □ | □ | □ | □ |

**Supplementary material S2.** Results of the assumption checks for multiple linear and logistic regression models.

Model 1, vaccination skepticism:

Multicollinearity was not a concern in our model (highest correlation between dependent and independent variables was r = .47 and VIF ranged between 1.02 and 2.04). The data met the assumption of independent residuals (Durbin-Watson = 2.036). The histogram and p-p plot of standardized residuals indicated that the data contained approximately normally distributed residuals with minimal deviation from the line. The scatterplot of standardized residuals showed that the data met the assumptions of homogeneity of variance and linearity. All participants in the model showed Cook’s Distance values below 1, wherefore all were included.

Model 2, perceived importance of vaccination for combating the pandemic:

Multicollinearity was not a concern in our model (highest correlation between dependent and independent variables was r = .45 and VIF ranged between 1.01 and 1.26). The data met the assumption of independent residuals (Durbin-Watson = 1.917). The histogram and p-p plot of standardized residuals indicated that the data contained approximately normally distributed residuals with minimal deviation from the line. The scatterplot of standardized residuals showed that the data met the assumptions of homogeneity of variance and linearity. All participants in the model showed Cook’s Distance values below 1, wherefore all were included.

Model 3, willingness to pay for vaccination:

Multicollinearity was not a concern in our model (highest correlation between dependent and independent variables was r = .62). The binomial logistic regression model was statistically significant, χ²(10) = 129.817, p < .001, resulting in a large amount of explained variance, as shown by Nagelkerke’s R² = .307. Goodness-of-fit was assessed using the Hosmer-Lemeshow-Test, indicating a good model fit, χ²(8) = 6.215, p = .623. Overall percentage of accuracy in classification was 75.4%, with a sensitivity of 45.5% and a  specificity of 91.2%. The scatterplot of standardized residuals showed that the data met the assumptions of homogeneity of variance and linearity. All participants in the model showed Cook’s Distance values below 1, wherefore all were included.
